# Supplementary material for: Spontaneous Adsorption and Efficient Photodegradation of Indigo Carmine under Visible Light by Bismuth Oxyiodide Nanoparticles Fabricated Entirely at Room Temperature
Source: MDPI journal article supplement (doi:10.3390/inorganics10050065), 2022-05-19
Supplement: s1 [file s1]

**Table S1** The obtained parameters for the adsorption kinetics, isotherms, and thermodynamics of the IC sorption on the BiOI nanoparticles.

| Adsorption rate order                                     |                               |                            |                                      |                                  |                                  |                                                        |
|-----------------------------------------------------------|-------------------------------|----------------------------|--------------------------------------|----------------------------------|----------------------------------|--------------------------------------------------------|
|                                                           | PSFO                          |                            |                                      | PSSO                             |                                  |                                                        |
| qe exp. (mg g <sup>-1</sup> )                             | qe cal. (mg g <sup>-1</sup> ) | R <sup>2</sup>             | k <sub>1</sub> (min <sup>-1</sup> )  | qe cal. (mg g <sup>-1</sup> )    | R <sup>2</sup>                   | k <sub>2</sub> (g mg <sup>-1</sup> min <sup>-1</sup> ) |
| 38.400                                                    | 46.282                        | 0.948                      | 0.053                                | 4.348                            | 0.873                            | 1.553                                                  |
| Adsorption rate control mechanism                         |                               |                            |                                      |                                  |                                  |                                                        |
| Intra particle diffusion model                            |                               |                            |                                      | Liquid film diffusion model      |                                  |                                                        |
| k <sub>ip</sub> (mg g <sup>-1</sup> min <sup>-1/2</sup> ) | R <sup>2</sup>                | Ci (mg g <sup>-1</sup> )   | K <sub>LF</sub> (min <sup>-1</sup> ) |                                  | R <sup>2</sup>                   |                                                        |
| 4.367                                                     | 0.965                         | 0.533                      | 0.053                                |                                  | 0.948                            |                                                        |
| Adsorption isotherms                                      |                               |                            |                                      |                                  |                                  |                                                        |
| Langmuir                                                  |                               |                            | Freundlich                           |                                  |                                  |                                                        |
| R <sup>2</sup>                                            | K <sub>L</sub>                | q <sub>m</sub>             | R <sup>2</sup>                       | K <sub>f</sub>                   | 1/n                              |                                                        |
| 0.943                                                     | 120.165                       | 0.040                      | 0.878                                | 0.182                            | 1.125                            |                                                        |
| Thermodynamic parameters                                  |                               |                            |                                      |                                  |                                  |                                                        |
| Fed conc. (mg L <sup>-1</sup> )                           | ΔH° (kJmol <sup>-1</sup> )    | ΔS° (kJmol <sup>-1</sup> ) | ΔG° (kJmol <sup>-1</sup> ) 298 K     | ΔG° (kJmol <sup>-1</sup> ) 308 K | ΔG° (kJmol <sup>-1</sup> ) 318 K |                                                        |
| 10                                                        | -33.477                       | -0.105                     | -2.283                               | -1.237                           | -0.190                           |                                                        |
| 25                                                        | -80.596                       | -0.263                     | -2.253                               | 0.375                            | 3.004                            |                                                        |
| 50                                                        | -115.170                      | -0.372                     | -4.436                               | -0.720                           | 2.996                            |                                                        |
| 100                                                       | -104.915                      | -0.343                     | -2.716                               | 0.713                            | 4.143                            |                                                        |
